# Supplementary material
Source: PubMed Central journal article supplement (PMC3732575)
Supplement: NIHMS489016-supplement-5.pdf [file NIHMS489016-supplement-5.pdf]

BCM-2147

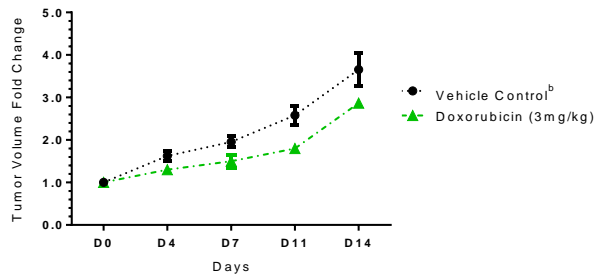

BCM-2665

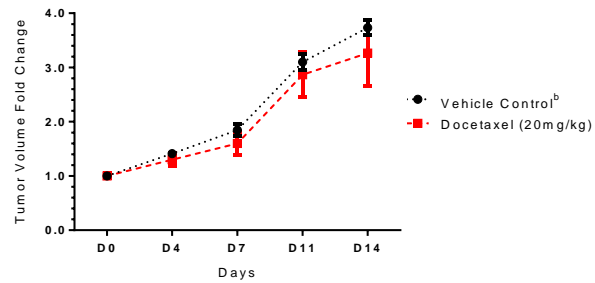

BCM-3107

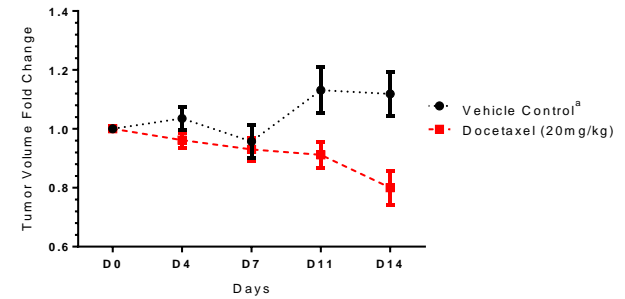

BCM-3561

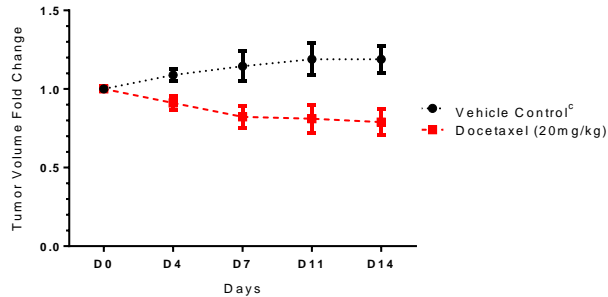

BCM-3611

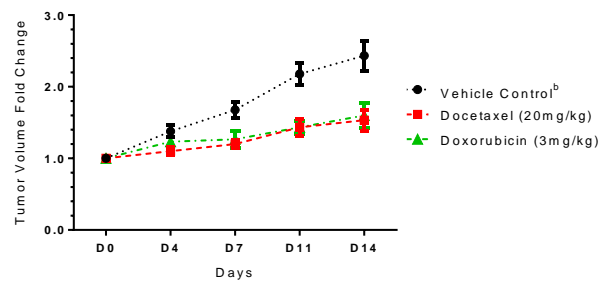

BCM-3807

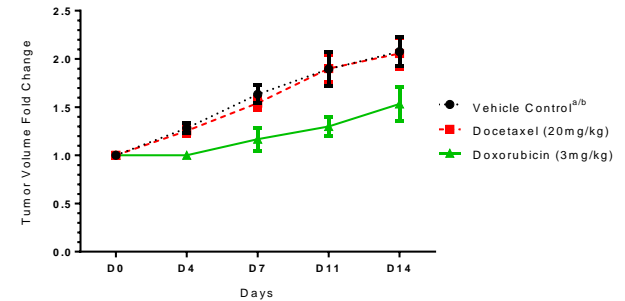

BCM-3963

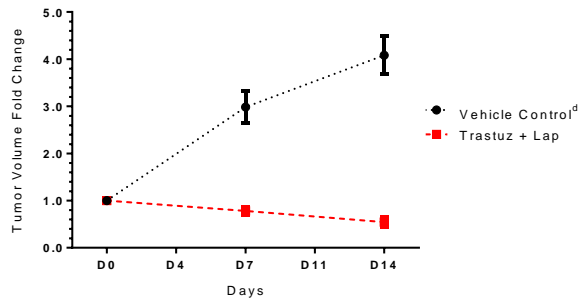

BCM-4013

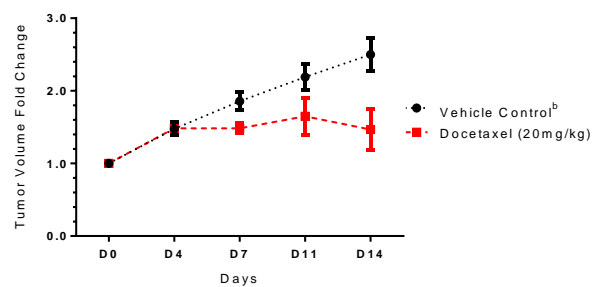

BCM-4175

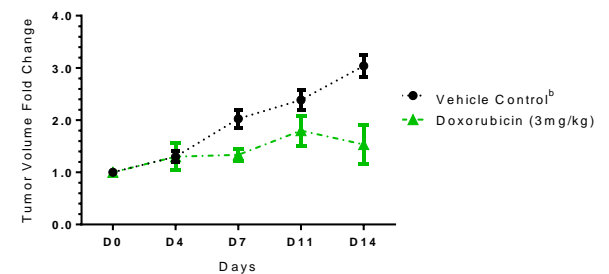

BCM-4195

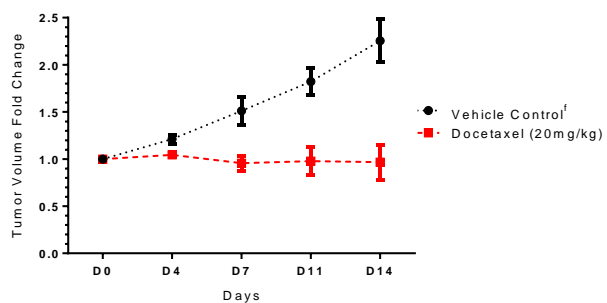

BCM-4664

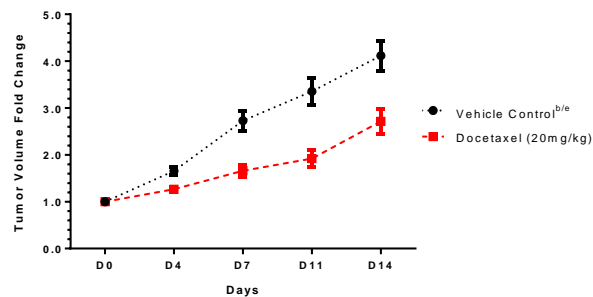

a = 0.5% Methylcellulose in water

b = 25% Tween80, 12.2% Ethanol in water

c = 5.4% Cyclodextran, 3% Tween80 in pH 4.0 Citrate Buffer

d = 1% Tween 80 in water

e = 0.5% Methylcellulose in water, 0.1% Tween 80 in water

f = 20% Tween80, 20% DMSO, 9.8% Ethanol in water
