# Supplementary material
Source: PubMed Central journal article supplement (PMC3732575)
Supplement: NIHMS489016-supplement-13.pdf [file NIHMS489016-supplement-13.pdf]

This table can be downloaded at <http://www.bcxenograft.org/xenograft/>.
